# Supplementary material for: Potential Prognostic Relevance of Left-Ventricular Global Longitudinal Strain and of the Summation of the Mitral and Tricuspid Regurgitation Volume in Patients with Non-Ischemic Dilated Cardiomyopathy
Source: MDPI journal article supplement (doi:10.3390/jcdd10100410), 2023-09-27
Supplement: s1 [file s1]

**Table S1.** Correlation analysis of early primary outcomes and whole-heart myocardial mechanics or morphometrics.

|                                    | Early outcomes |        |
|------------------------------------|----------------|--------|
|                                    | rs             | p      |
| LVESDi, mm/m <sup>2</sup>          | -0.369         | 0.008  |
| LVEDDi, mm/m <sup>2</sup>          | -0.378         | 0.006  |
| LAVi, mm/m <sup>2</sup>            | -0.265         | 0.010  |
| RAVi, mm/m <sup>2</sup>            | -0.109         | 0.296  |
| GRV, ml                            | -0.501         | <0.001 |
| LVEDVi, ml/m <sup>2</sup>          | -0.068         | 0.515  |
| LVESVi, ml/m <sup>2</sup>          | -0.137         | 0.189  |
| RVEDVi, ml                         | -0.123         | 0.239  |
| RVESVi, ml                         | -0.173         | 0.096  |
| LVGLS, %                           | -0.530         | <0.001 |
| LVGCS, %                           | -0.121         | 0.244  |
| LVGRS, %                           | 0.083          | 0.420  |
| LVEF, %                            | 0.195          | 0.342  |
| GSI                                | -0.109         | 0.932  |
| Longitudinal-circumferential index | -0.210         | 0.833  |
| RVEF, %                            | 0.179          | 0.081  |
| RV GLS, %                          | -0.117         | 0.254  |
| LAScd, %                           | -0.164         | 0.536  |
| LASr, %                            | 0.369          | 0.018  |
| LASct, %                           | -0.114         | 0.270  |
| RAScd, %                           | -0.196         | 0.056  |
| RASr, %                            | 0.116          | 0.379  |
| RASct, %                           | -0.129         | 0.479  |

LVESDi – left ventricular end-systolic diameter index; LVEDDi – left ventricular end-diastolic diameter index; LVEDVi – left ventricular end-diastolic volume index; LVESVi – left ventricular end-systolic volume index; LVGLS – left ventricular global longitudinal strain; LVGCS – left ventricular global circumferential strain; LVGRS – left ventricular global radial strain; LVEF – left ventricular ejection fraction; RVEDVi – right ventricular end-diastolic volume index; RVESVi – right ventricular end-systolic volume index; RVGLS – right ventricular global longitudinal strain; GSI – global systolic index; RVEF – right ventricular ejection fraction; LAVi – left atrial volume index; RAVi – right atrial volume index; LASr – left atrial strain during reservoir phase; LAScd – left atrial strain during conduit phase; LASct – left atrial strain during contraction phase; RAScd – right atrial strain during conduit phase; RASct – right atrial strain during contraction phase; RASr – right atrial strain during reservoir phase.

**Table S2.** Binary logistic regression analysis for the 2D echocardiographic parameters related to the presence of early primary outcomes.

| Parameter | OR    | 95% CI      | p     |
|-----------|-------|-------------|-------|
| LVGLS, %  | 0.770 | 0.646-0.918 | 0.004 |
| GRV, ml   | 1.098 | 1.010-1.296 | 0.011 |

LVGLS – left ventricular global longitudinal strain; GRV – global regurgitation volume; CI – confidence interval; OR – odds ratio.
